# Supplementary material for: Effects of synbiotic supplementation on regulatory T cells’ response in patients with axial spondyloarthritis: a randomized double-masked placebo-controlled trial
Source: Royal Society of Chemistry journal article supplement (doi:10.1039/d2fo01377k), 2022-01-01
Supplement: d2fo01377k1.pdf [file d2fo01377k1.pdf]

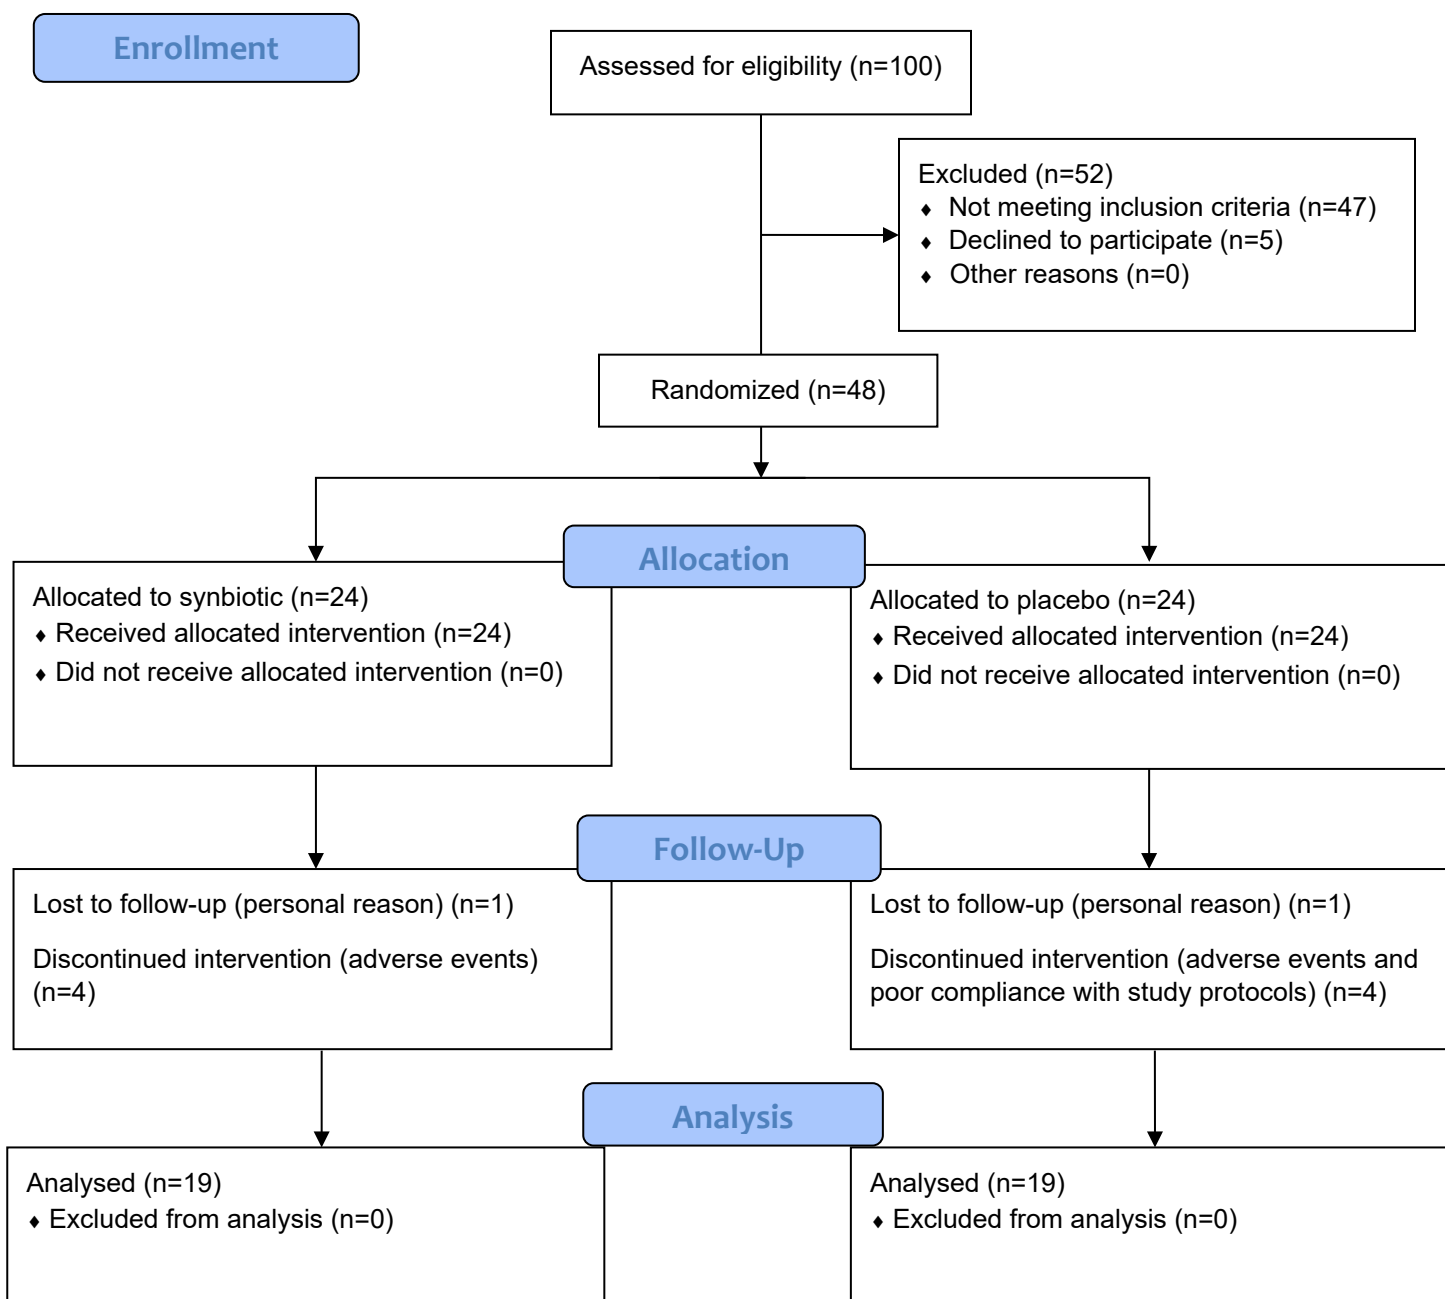

CONSORT Flow Diagram of Study

Baseline characteristics of study patients

| <b>Characteristic</b>      | <b>Synbiotic group<br/>(n=19)</b> | <b>Placebo group<br/>(n=19)</b> | <b>P-value*</b> |
|----------------------------|-----------------------------------|---------------------------------|-----------------|
| Age (years)                | 41.32±6.76                        | 38.12±7.66                      | 0.192           |
| Sex                        |                                   |                                 | 0.532           |
| Male                       | 14 (74)                           | 16 (84)                         |                 |
| Female                     | 5 (26)                            | 3 (16)                          |                 |
| Duration of disease, years | 12.37±7.62                        | 10.41±6.25                      | 0.409           |
| BMI (kg/m <sup>2</sup> )   | 28.21±5.65                        | 27.12±5.95                      | 0.576           |
| ASDAS                      | 2.48 ± 0.96                       | 2.76 ± 0.89                     | 0.374           |
| Sacroiliitis in imaging    | 17 (89)                           | 18 (95)                         | 0.547           |
| Spondylitis in imaging     | 11 (58)                           | 9 (47)                          | 0.516           |
| HLA-B27 Positive           | 7 (37)                            | 7 (37)                          | 0.616           |
| Medications                |                                   |                                 | 0.865           |
| Biologics                  | 9 (47)                            | 9 (47)                          |                 |
| NSAIDs                     | 8 (42)                            | 7 (37)                          |                 |
| None                       | 2 (11)                            | 3 (16)                          |                 |

BMI, body mass index; ASDAS, ankylosing spondylitis disease activity score; HLA, human leukocyte antigen; NSAIDs, non-steroidal anti-inflammatory drugs.

Continuous variables were reported as mean ± SD while categorical variables were reported as frequency (percentage).

P<0.05 was considered significant.

\* P values indicate comparison between groups (Independent sample t-test or Chi-square test, as appropriate).
